# Supplementary material for: Red cabbage microgreen modulation of gut microbiota is associated with attenuation of diet-induced obesity risk factors in a mouse model
Source: Royal Society of Chemistry journal article supplement (doi:10.1039/d3fo01249b), 2023-01-01
Supplement: d3fo01249b1.pdf [file d3fo01249b1.pdf]

## Electronic Supplementary Information

### **Red cabbage microgreens modulation of gut microbiota is associated with attenuation of diet-induced obesity risk factors in a mouse model**

Yanbei Wu <sup>a</sup>, Quynhchi Pham <sup>b</sup>, Yali Wang <sup>a</sup>, Haiqiu Huang <sup>b</sup>, Xiaojing Jiang <sup>b</sup>, Robert W. Li <sup>c</sup>, Liangli Yu <sup>d</sup>, Yaguang Luo <sup>e</sup>, Jing Wang <sup>a</sup>, Thomas T.Y. Wang <sup>b\*</sup>

<sup>a</sup> China-Canada Joint Lab of Food Nutrition and Health (Beijing), Beijing Technology & Business University, Beijing 100084, PR China

<sup>b</sup> Diet Genomics and Immunology Laboratory, BHNRC, ARS, USDA, Beltsville, MD 20705, USA

<sup>c</sup> Animal Parasitic Diseases Laboratory, BARC, ARS, USDA, Beltsville, MD 20705, USA

<sup>d</sup> Department of Nutrition and Food Science, University of Maryland, College Park, MD 20742, USA

<sup>e</sup> Food Quality Laboratory, BARC, ARS, USDA, Beltsville, MD 20705, USA

**Table S1.** Primer sequence used for microbial analysis by real-time PCR.

| <b>Bacteria</b>                | <b>Direction</b> | <b>Sequence (5'-3')</b>         |
|--------------------------------|------------------|---------------------------------|
| Bacteroidetes                  | Forward          | GGARCATGTGGTTTAATTCGATGAT       |
|                                | Reverse          | AGCTGACGACAACCATGCAG            |
| Firmicutes                     | Forward          | GGAGYATGTGGTTTAATTCGAAGCA       |
|                                | Reverse          | AGCTGACGACAACCATGCAC            |
| <i>Prevotella</i>              | Forward          | TCCTACGGGAGGCAGCAGT             |
|                                | Reverse          | CAATCGGAGTTCTTCGTG              |
| <i>Enterobacteriaceae</i>      | Forward          | CATTGACGTTACCCGCAGAAGAAGC       |
|                                | Reverse          | CTCTACGAGACTCAAGCTTGC           |
| <i>Ruminococcus</i>            | Forward          | GGCGGCCTACTGGGCTTT              |
|                                | Reverse          | CCA GGT GGA TAA CTT ATT GTG TAA |
| <i>Bifidobacteria</i>          | Forward          | TCGCGTCYGGTGTGAAAG              |
|                                | Reverse          | CCACATCCAGCRTCCAC               |
| <i>Lactobacillus</i>           | Forward          | GAGGCAGCAGTAGGGAATCTTC          |
|                                | Reverse          | GGCCAGTTACTACCTCTATCCTTCTTC     |
| <i>Akkermansia muciniphila</i> | Forward          | CAGCACGTGAAGGTGGGGAC            |
|                                | Reverse          | CCT TCGGTTGGCTTCAGAT            |

**Table S2.** Relative abundance (%) of the bacterial taxa at phylum level in cecal samples of mice grouped by diet (LF: low-fat diet, HF: high-fat diet, LFMG: low-fat diet supplemented with red cabbage microgreen powder, HFMG: high-fat diet supplemented with red cabbage microgreen powder).

| Phylum                 | Diet       |             |            |            |
|------------------------|------------|-------------|------------|------------|
|                        | LF         | HF          | LFMG       | HFMG       |
| Bacteroidetes          | 60.00±2.45 | 53.47±6.21  | 55.72±5.21 | 47.89±4.1  |
| Firmicutes             | 34.41±2.19 | 39.19±5.92  | 37.69±5.55 | 44.87±4.21 |
| <i>Proteobacteria</i>  | 3.18±0.61  | 4.77±0.26   | 3.15±0.53  | 4.28±0.96  |
| <i>Deferribacteres</i> | 2.17±0.78  | 2.38±1.24   | 2.91±0.76  | 2.83±0.83  |
| <i>Verrucomicrobia</i> | 0.16±0.17  | 0.085±0.164 | 0.10±0.17  | 0.02±0.04  |
| <i>TM7</i>             | 0.08±0.04  | 0.09±0.11   | 0.09±0.03  | 0.09±0.07  |
| <i>Actinobacteria</i>  | 0.01±0.00  | 0.01±0.00   | 0.02±0.01  | 0.02±0.01  |

**Table S3.** Correlation of obesity-related risk factors with differentially abundant microbial features (with the relative abundance greater than 1%) identified in the caecal content of mice fed low- or high-fat diets with or without red cabbage microgreen. <sup>a,b,c</sup>

| Features at genus level             | Weight gain | LDL    | HDL | VLDL | Hepatic Cholesterol Ester | Hepatic Triglycerides | Fecal bile acid |
|-------------------------------------|-------------|--------|-----|------|---------------------------|-----------------------|-----------------|
| Unclassified <i>S24-7</i>           | -0.43*      | -0.42* | NC  | NC   | NC                        | NC                    | NC              |
| Unclassified <i>Clostridiales</i>   | NC          | NC     | NC  | NC   | -0.43*                    | NC                    | NC              |
| Unclassified <i>Ruminococcaceae</i> | 0.43*       | NC     | NC  | NC   | NC                        | NC                    | 0.49*           |
| <i>AF12</i>                         | 0.52**      | 0.38*  | NC  | NC   | NC                        | NC                    | 0.59***         |
| <i>Bilophila</i>                    | 0.49*       | NC     | NC  | NC   | NC                        | NC                    | 0.45*           |

<sup>a</sup>: NC = no correlation ( $p > 0.05$ ), \* $p \leq 0.05$ , \*\* $p \leq 0.01$ , \*\*\* $p \leq 0.001$ .

<sup>b</sup>: Plus/minus symbol indicates the positive/negative correlation between factors and bacteria.

<sup>c</sup>: The value represents Pearson correlation coefficient.

**Table S4.** Topological properties of the global network inferred using a Random-Matrix theory (RMT) based network pipeline under various experimental conditions.

| <b>Network Indexes</b>                        | <b>LF</b>  | <b>HF</b>   | <b>LFMG</b> | <b>HFMG</b> |
|-----------------------------------------------|------------|-------------|-------------|-------------|
| Total nodes                                   | 247        | 245         | 302         | 257         |
| Total links                                   | 416        | 483         | 643         | 471         |
| Total modules                                 | 23         | 23          | 29          | 29          |
| Modularity (M)                                | 0.819      | 0.72        | 0.778       | 0.77        |
| R square of power-law                         | 0.71       | 0.80        | 0.786       | 0.91        |
| Average degree (avgK)                         | 3.368      | 3.94        | 4.258       | 3.67        |
| Average clustering coefficient (avgCC)        | 0.304      | 0.32        | 0.412       | 0.22        |
| Average path distance (GD)                    | 8.217      | 6.97        | 8.1         | 6.55        |
| Geodesic efficiency (E)                       | 0.166      | 0.20        | 0.184       | 0.20        |
| Harmonic geodesic distance (HD)               | 6.039      | 4.92        | 5.431       | 4.91        |
| Maximal degree                                | 13         | 16          | 17          | 18          |
|                                               |            | OTU 1136443 |             |             |
| Nodes with max degree                         | OTU 262625 | OTU 1684221 | OTU 716006  | OTU 263705  |
|                                               |            | OTU 329790  |             | OTU 462832  |
|                                               |            | OTU 317633  |             |             |
| Centralization of degree (CD)                 | 0.039      | 0.05        | 0.043       | 0.06        |
| Maximal betweenness                           | 6815.31    | 4996.26     | 6003.48     | 4128.33     |
| Nodes with max betweenness                    | OTU 262677 | OTU 275366  | OTU 434339  | OTU 227886  |
| Centralization of betweenness (CB)            | 0.204      | 0.15        | 0.121       | 0.11        |
| Maximal stress centrality                     | 48167      | 33304       | 277722      | 40607       |
| Nodes with max stress centrality              | 262677     | 418501      | 434339      | 341252      |
| Centralization of stress centrality (CS)      | 1.451      | 1.04        | 5.625       | 1.17        |
| Maximal eigenvector centrality                | 0.355      | 0.31        | 0.318       | 0.32        |
| Nodes with max eigenvector centrality         | OTU 353012 | OTU 317633  | OTU 716006  | OTU 263705  |
| Centralization of eigenvector centrality (CE) | 0.335      | 0.28        | 0.299       | 0.31        |
| Density (D)                                   | 0.014      | 0.02        | 0.014       | 0.01        |
| Reciprocity                                   | 1.00       | 1.00        | 1.00        | 1.00        |
| Transitivity (Trans)                          | 0.359      | 0.35        | 0.461       | 0.37        |
| Connectedness (Con)                           | 0.78       | 0.63        | 0.535       | 0.61        |
| Efficiency                                    | 0.987      | 0.98        | 0.979       | 0.98        |
| Hierarchy                                     | 0.00       | 0.00        | 0.00        | 0.00        |
| Lubness                                       | 1.00       | 1.00        | 1.00        | 1.00        |

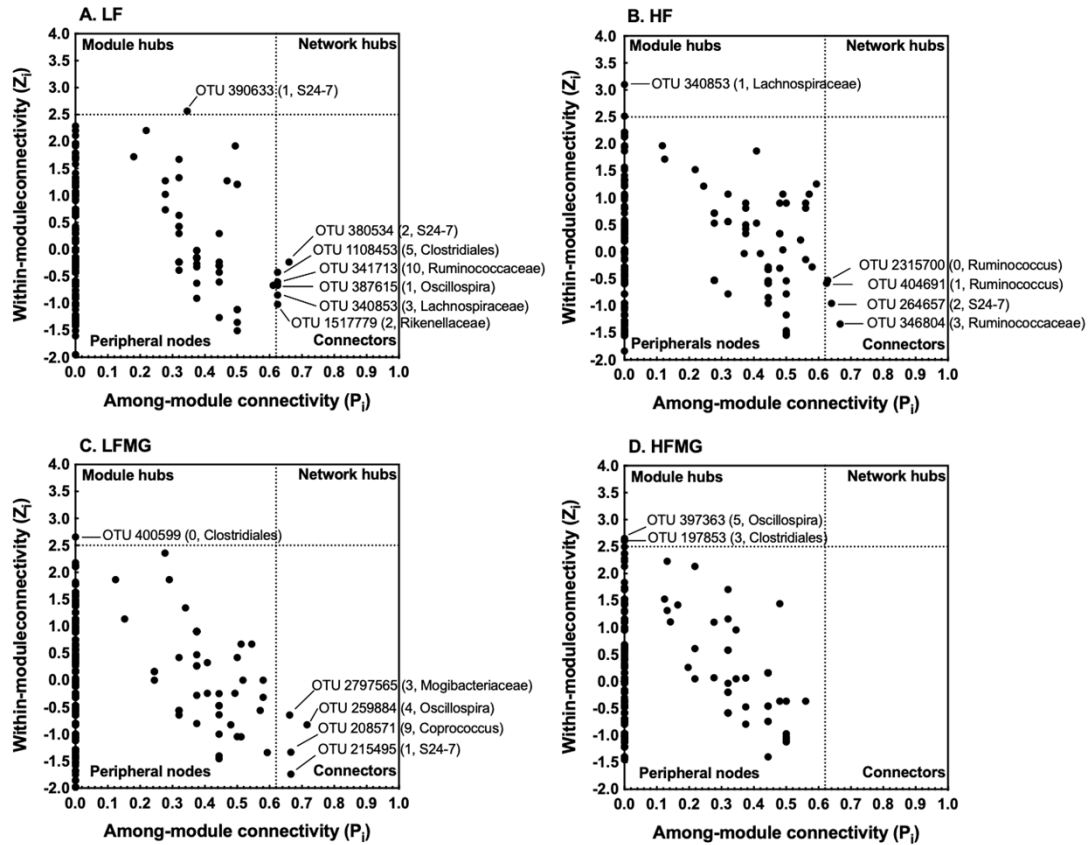

**Fig. S1.** Z-P plot showing the distribution of OTUs based on their topological roles in the network. Each dot represents an OTU under different diet groups (HF: a high-fat diet, HFMG: a high-fat diet supplemented with RCMG). The topological role of each OTU was determined according to the scatter plot of within-module connectivity ( $Z_i$ ) and among-module connectivity ( $P_i$ ). The module hubs and connectors are labeled with OTU numbers. In parentheses are the module number and phylogenetic associations.
